# Supplementary material for: Smart flocculant with temperature and pH response derived from starch
Source: Royal Society of Chemistry journal article supplement (doi:10.1039/c6ra04060h), 2016-01-01
Supplement: c6ra04060h1.pdf [file c6ra04060h1.pdf]

## Supporting Information

# Smart Flocculant with Temperature and pH Response Derived from Starch

Yu Wang<sup>a</sup>, Yuling Shi<sup>a,b\*</sup>, Mengyao Xu<sup>a</sup>, Liang Wu<sup>a</sup>, Xin Jia<sup>a</sup>, Tingting Wei<sup>a</sup>, Shufen Zhang<sup>c</sup>, Xuhong Guo<sup>a,b\*</sup>

<sup>a</sup>Engineering Research Center of Materials Chemical Engineering of Xinjiang Bingtuan and Key Laboratory of Materials Chemical Engineering of Xinjiang Uygur Autonomous Region, Shihezi University, Shihezi 832000, China.

<sup>b</sup>State Key Laboratory of Chemical Engineering, East China University of Science and Technology, Shanghai 200237, China

<sup>c</sup>State Key Laboratory of Fine Chemicals, Dalian University of Technology, Dalian 116024, China

\*To whom correspondence should be addressed. E-mail: shiyulin@shzu.edu.cn (Yuling Shi) and guoxuhong@ecust.edu.cn (Xuhong Guo)

**Table S1** The degree of substitution and Elemental analysis of TPRS.

|   | C (%) | H (%) | N (%) | DS  |
|---|-------|-------|-------|-----|
| 1 | 46.45 | 7.57  | 11.59 | 0.4 |
| 2 | 46.60 | 7.08  | 14.69 | 0.6 |
| 3 | 46.38 | 6.85  | 20.85 | 1.2 |

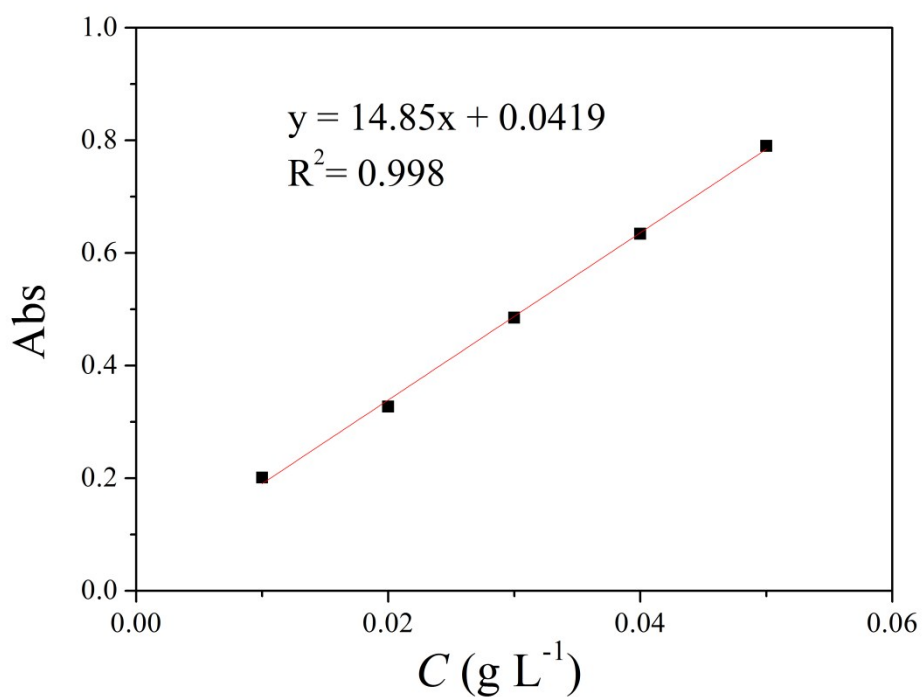

**Fig. S1** Calibration curve of the AR SE.
